# Supplementary material for: XCP1 cleaves Pathogenesis-related protein 1 into CAPE9 for systemic immunity in Arabidopsis
Source: PubMed Central journal article supplement (PMC10403534; doi:10.1038/s41467-023-40406-7), 2023-08-04
Supplement: 41467_2023_40406_MOESM1_ESM.pdf [file 41467_2023_40406_MOESM1_ESM.pdf]

## Supplementary Information

### Supplementary Tables and Figures

**Supplementary Table 1. Putative untruncated and truncated form sizes of *Arabidopsis* papain-like cysteine proteases.**

| AT Gene #        | Protein Name | PLCP Subfamily <sup>a</sup> | Putative Protein Size <sup>b</sup> (kDa)<br>(Untruncated / truncated form) |
|------------------|--------------|-----------------------------|----------------------------------------------------------------------------|
| At4g36880        | RDL1         | I                           | 39.40 / 25.20                                                              |
| At3g19400        | RDL2         | I                           | 37.55 / 25.16                                                              |
| At3g43960        | RDL3         | I                           | 38.76 / 27.10                                                              |
| At4g11310        | RDL4 (CP1)   | I                           | 37.67 / <b>24.68</b>                                                       |
| At4g11320        | RDL5 (CP2)   | I                           | 38.35 / <b>24.64</b>                                                       |
| At4g23520        | RDL6         | I                           | <b>36.81</b> / <b>24.41</b>                                                |
| At1g47128        | RD21A        | I                           | <b>35.40</b> / <b>23.30</b>                                                |
| At5g43060        | RD21B        | I                           | <b>35.33</b> / <b>23.26</b>                                                |
| At4g19390        | RD21C        | I                           | <b>34.41</b> / <b>23.25</b>                                                |
| At5g50260        | CEP1         | II                          | 38.43 / 25.73                                                              |
| At3g48340        | CEP2         | II                          | 38.12 / 25.19                                                              |
| At3g48350        | CEP3         | II                          | 38.71 / 26.03                                                              |
| <b>At4g35350</b> | <b>XCP1</b>  | III                         | <b>36.80</b> / <b>23.79</b>                                                |
| At1g20850        | XCP2         | III                         | 37.08 / <b>23.77</b>                                                       |
| At1g09850        | XBCP3        | IV                          | 39.00 / <b>23.43</b>                                                       |
| At1g06260        | THI1         | V                           | <b>34.54</b> / <b>23.22</b>                                                |
| At5g45890        | SAG12        | VI                          | <b>35.37</b> / -                                                           |
| At2g34080        | PAP1         | VI                          | <b>35.76</b> / -                                                           |
| At1g29090        | PAP2         | VI                          | <b>36.36</b> / -                                                           |
| At1g29080        | PAP3         | VI                          | <b>36.11</b> / -                                                           |
| At2g27420        | PAP4         | VI                          | <b>36.50</b> / -                                                           |
| At3g49340        | PAP5         | VI                          | <b>35.65</b> / -                                                           |
| At4g39090        | RD19A        | VII                         | 37.85 / 25.12                                                              |
| At2g21430        | RD19B        | VII                         | 37.12 / <b>24.70</b>                                                       |
| At4g16190        | RD19C        | VII                         | 39.14 / 25.35                                                              |
| At3g54940        | RD19D        | VII                         | 37.81 / 25.07                                                              |
| At5g60360        | AALP         | VIII                        | <b>36.95</b> / <b>23.42</b>                                                |
| At3g45310        | ALP2         | VIII                        | 37.41 / <b>23.65</b>                                                       |
| At1g02300        | CTB1         | IX                          | 37.27 / 29.21                                                              |
| At1g02305        | CTB2         | IX                          | <b>34.75</b> / 26.64                                                       |
| At4g01610        | CTB3         | IX                          | <b>34.94</b> / 26.53                                                       |

<sup>a</sup> There are 9 subfamilies of *Arabidopsis* papain-like cysteine proteases (PLCPs) classified by their domain structures. Here was indicated as I to IX. (*Plant Physiol.* 2012, Vol. 158, pp. 1583–1599)

<sup>b</sup> The putative protein sizes of PLCPs are represented for their untruncated and truncated forms reported in UniProt (<https://www.uniprot.org/>). Red color indicates the selected protease size ranging from 34 kDa to 37 kDa for untruncated form and 23 kDa to 25 kDa for truncated form.

**Supplementary Table 2. List of *Arabidopsis* T-DNA insertion mutants**

| <b>Name</b>  | <b>Gene</b> | <b>Mutant Line</b> |
|--------------|-------------|--------------------|
| <i>xcp1</i>  | At4g35350   | SALK_084789        |
| <i>xcp2</i>  | At1g20850   | SALK_010938        |
| <i>rd19b</i> | At2g21430   | SALK_095569        |
| <i>sag12</i> | At5g45890   | SALK_095721        |
| <i>aalp</i>  | At5g60360   | SALK_075550        |
| <i>rd21c</i> | At3g19390   | SALK_058300        |
| <i>thi1</i>  | At1g06260   | SALK_056849        |
| <i>rd19a</i> | At4g39090   | SALK_031088        |
| <i>ctb3</i>  | At4g01610   | SALK_019630        |

**Supplementary Table 3. Primers used in this study**

| <b>Primers for cloning</b>               |                                                                        |
|------------------------------------------|------------------------------------------------------------------------|
| PR1 F'                                   | ATG AAT TTT ACT GGC TAT TCT CGA TTT TT                                 |
| PR1-D150A/P151A F'                       | ATG AAT TTT ACT GGC TAT TCT CGA TTT TTA ATC GTC TTT GTA GCT CTT GTA GG |
| PR1-D150A R'                             | GTA TGG CTT CTC GTT CAC ATA ATT CCC ACG AGG AGC ATA GTT GCA ACT G      |
| PR1-P151A R'                             | GTA TGG CTT CTC GTT CAC ATA ATT CCC ACG CGC ATC ATA GTT GC             |
| PR1 CDS R'                               | TTA GTA TGG CTT CTC GTT CAC                                            |
| CAPE9-truncated PR1 R'                   | TTA ATC ATA GTT GCA ACT GAT TAT                                        |
| PR1-BsF1 (for CRISPR/Cas9)               | ATA TAT GGT CTC GAT TGT CCC ATG CAG TGG GAC GAG AGT T                  |
| PR1-F10 (for CRISPR/Cas9)                | TGT CCC ATG CAG TGG GAC GAG AGT TTT AGA GCT AGA AAT AGC                |
| DT0-BsR2 (for CRISPR/Cas9)               | ATA TTA TTG GTC TCA ATC TCT TAG TCG ACT CTA CCA AT                     |
| PR1-BsF2 (for CRISPR/Cas9)               | ATA TTA TTG GTC TCA AGA TTG TAG CCC ACA AGA TTA TCT AAG TT             |
| PR1-F20 (for CRISPR/Cas9)                | TGT AGC CCA CAA GAT TAT CTA AGT TTT AGA GCT AGA AAT AGC                |
| PR1-R0 (for CRISPR/Cas9)                 | AAC ACC AGA GTG TAT GAG TCT GCC AAT CAC TAC TTC GTC TCT AAC CAT        |
| PR1-BsR3 (for CRISPR/Cas9)               | ATT ATT GGT CTC GAA ACA CCA GAG TGT ATG AGT CTG CC                     |
| XCP1-His F'                              | ATG GCT TTT TCT GCA CCA TCA CTT TCC                                    |
| XCP1-His R1'                             | GAT GAT GAT GCT TGG TCT TGG TAG GAT AT                                 |
| XCP1-His R2'                             | TCA ATG ATG ATG ATG ATG ATG CTT GGT CT                                 |
| XCP1 promoter F'                         | AAA AGC CTG CAG GGT GTT TGC ACT TTG CA                                 |
| XCP1 promoter R'                         | AGC CAT GGG CCC CCA AAT TTG TTC ACT                                    |
| XCP1-C161A F'                            | GGT CAA TGT GGT AGC GCT TGG GCA TTT TCA ACA                            |
| XCP1-C161A R'                            | CTG TTG AAA ATG CCC AAG CGC TAC CAC ATT GAC                            |
| <b>Primers for gene expression level</b> |                                                                        |
| PR1 RT-PCR F'                            | GTG CTC TTG TTC TTC CCT CG                                             |
| PR1 RT-PCR R'                            | GCC TGG TTG TGA ACC CTT AG                                             |
| XCP1 RT-PCR F'                           | GAT ACA CGC CGG AGC ATT TG                                             |
| XCP1 RT-PCR R'                           | GTA GCC GCT GAT TGT CAC AC                                             |
| XCP1 qPCR F'                             | GCT CAT CAG CCA GTC AGT G                                              |
| XCP1 qPCR R'                             | ACC ATT AAA CAC TCC CCC TTT GT                                         |
| PR1-eYFP RT-PCR R'                       | GAA CTT CAG GGT CAG CTT GCC GTA                                        |
| ACTIN2 RT/qPCR F'                        | GGT AAC ATT GTG CTC AGT GGT GG                                         |
| ACTIN2 RT/qPCR R'                        | GGT GCA ACG ACC TTA ATC TTC AT                                         |
| <b>Primers for genotyping</b>            |                                                                        |
| Lbb. 1.3                                 | ATT TTG CCG ATT TCG GAA C                                              |
| PR1-F                                    | ATG AAT TTT ACT GGC TAT TCT CGA TTT TT                                 |
| PR1-R                                    | GTA TGG CTT CTC GTT CAC ATA ATT C                                      |
| 8484-F                                   | TTT TCC CAG TCA CGA CGT TGT                                            |
| 8485-R                                   | GTC CTT GTA TAA ACG CAA TG                                             |
| SV40 NLS-F                               | CCG AAG AAG AAG AGG AAG GTT                                            |
| Cas9-middle-R                            | CGT CTT CCC GGA CTG CTT                                                |
| XCP1 LP                                  | GAA GCC TCA ATA GCC ACA CTG                                            |
| XCP1 RP                                  | TAT GGC TTT TTC TGC ACC ATC                                            |
| XCP2 LP                                  | AAA GGG AAA AGC TAC TGG CTC                                            |
| XCP2 RP                                  | GGT TTC CCA GTG TTC CTC TTC                                            |
| CTB3 LP                                  | TTG TGT GTG TGT GTT GAC TGC                                            |
| CTB3 RP                                  | AAA ACT TAC ATC ACC CCA GCC                                            |
| AALP LP                                  | TAG TTT TGG TGG TTC TCG TCG                                            |
| AALP RP                                  | CTG ATG GTA AGC TGC CTC AAG                                            |
| RD19A LP                                 | AAC CTC GTG ATC ACA GTC GAC                                            |
| RD19A RP                                 | AGA CAA CAC GGC ACT GCT AAC                                            |
| mRD19B LP                                | CTG ACT CGT TCT GAG TTT CGG                                            |
| mRD19B RP                                | TGG CAT TGT TGT TTC GAA TTC                                            |
| mRD21C LP                                | GTA CCT TCC GGG AAT GGT TAG                                            |
| mRD21C RP                                | CAT AAG ACC TCC ACC ACA TCC                                            |
| SAG12 LP                                 | ACT GTT CAA TGG AGC GAA TTG                                            |
| SAG12 RP                                 | CAA AAA GAC CAA TCC AAA AGC                                            |
| THI1 LP                                  | CAA AGA GAT GGT GAG CAA AGC                                            |
| THI1 RP                                  | CAA GCT ATC CCT TGC AGT GAG                                            |

**MASCOT** Mascot Search Results

**Peptide View**

MS/MS Fragmentation of **PRGNVNEKPY**

Found in **AT2G14610.1**, | pathogenesis-related protein 1 | Chr2:6241944-6242429 REVERSE LENGTH=161 | 201606

Match to Query 6336: 1335.657632 from(668.836092,2+) intensity(1713972.2500)

Title: 200220\_Cindee\_QEHF\_Arab\_Pep\_SA\_DDA2\_F16.6503.6503.2 File:"200220\_Cindee\_QEHF\_Arab\_Pep\_SA\_DDA2\_F16.raw", NativeID:"controllerType=0 controllerNumber=1 scan=6503"

Data file D:\files\experiments\data\MSdata\QEHF\2019-2021\210913\_reanalyze cindee data SA24h arab pep\imgf (nonuniqua)\200220\_Cindee\_QEHF\_Arab\_Pep\_SA\_DDA2\_F16.mgf

Click mouse within plot area to zoom in by factor of two about that point

Or,  to  Da

Label all possible matches  Label matches used for scoring

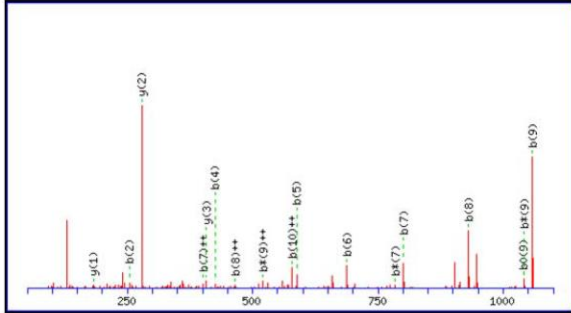

Monoisotopic mass of neutral peptide Mr(calc): 1335.657120

Ions Score: 33 Expect: 0.017

Matches: 17/94 fragment ions using 40 most intense peaks ([help](#))

| #  | b                  | b <sup>++</sup>   | b*                 | b <sup>+++</sup>  | b <sup>0</sup>     | b <sup>0++</sup> | Seq. | y                 | y <sup>++</sup> | y*          | y <sup>+++</sup> | y <sup>0</sup> | y <sup>0++</sup> | #  |
|----|--------------------|-------------------|--------------------|-------------------|--------------------|------------------|------|-------------------|-----------------|-------------|------------------|----------------|------------------|----|
| 1  | 98.060040          | 49.533658         |                    |                   |                    |                  | P    |                   |                 |             |                  |                |                  | 11 |
| 2  | <b>254.161151</b>  | 127.584213        | 237.134602         | 119.070939        |                    |                  | R    | 1239.611662       | 620.309469      | 1222.585113 | 611.796195       | 1221.601097    | 611.304187       | 10 |
| 3  | 311.182615         | 156.094945        | 294.156066         | 147.581671        |                    |                  | G    | 1083.510551       | 542.258914      | 1066.484002 | 533.745639       | 1065.499986    | 533.253631       | 9  |
| 4  | <b>425.225542</b>  | 213.116409        | 408.198993         | 204.603135        |                    |                  | N    | 1026.489087       | 513.748182      | 1009.462538 | 505.234907       | 1008.478522    | 504.742899       | 8  |
| 5  | <b>588.288871</b>  | 294.648074        | 571.262322         | 286.134799        |                    |                  | Y    | 912.446160        | 456.726718      | 895.419611  | 448.213443       | 894.435595     | 447.721435       | 7  |
| 6  | <b>687.357285</b>  | 344.182281        | 670.330736         | 335.690006        |                    |                  | V    | 749.382831        | 375.195054      | 732.356282  | 366.681779       | 731.372266     | 366.189771       | 6  |
| 7  | <b>801.400212</b>  | <b>401.203744</b> | <b>784.373663</b>  | 392.690470        |                    |                  | N    | 650.314417        | 325.660847      | 633.287868  | 317.147572       | 632.303852     | 316.655564       | 5  |
| 8  | <b>930.442805</b>  | <b>465.725041</b> | 913.416256         | 457.211766        | 912.432240         | 456.719758       | E    | 536.271490        | 268.639383      | 519.244941  | 260.126109       | 518.260925     | 259.634101       | 4  |
| 9  | <b>1058.537768</b> | 529.772522        | <b>1041.511219</b> | <b>521.259248</b> | <b>1040.527203</b> | 520.767239       | K    | <b>407.228897</b> | 204.118086      | 390.202348  | 195.604812       |                |                  | 3  |
| 10 | 1155.590532        | <b>578.298904</b> | 1138.563983        | 569.785630        | 1137.579967        | 569.293621       | P    | <b>279.133934</b> | 140.070605      |             |                  |                |                  | 2  |
| 11 |                    |                   |                    |                   |                    |                  | Y    | <b>182.081170</b> | 91.544223       |             |                  |                |                  | 1  |

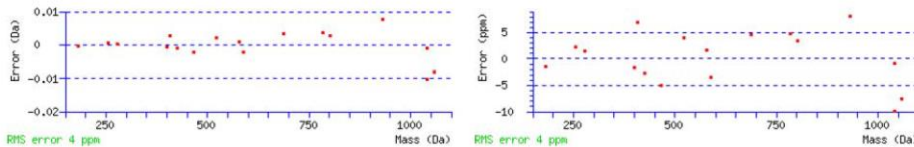

NCBI BLAST search of **PRGNVNEKPY**

(Parameters: blastp, nr protein database, expect=20000, no filter, PAM30)

Other BLAST [web gateways](#)

All matches to this query

| Score | Mr(calc):   | Delta     | Sequence                      |
|-------|-------------|-----------|-------------------------------|
| 33.4  | 1335.657120 | 0.000512  | <a href="#">PRGNVNEKPY</a>    |
| 13.7  | 1335.652664 | 0.004968  | <a href="#">ODKGGKMPMSVTV</a> |
| 13.5  | 1334.654678 | 1.002954  | <a href="#">KENCLGKERCR</a>   |
| 13.5  | 1335.656647 | 0.000985  | <a href="#">KKMESFYKLM</a>    |
| 12.4  | 1335.656662 | 0.000970  | <a href="#">KGIWCVMEIELE</a>  |
| 11.7  | 1335.660492 | -0.002860 | <a href="#">AFKSPGADRKME</a>  |
| 9.6   | 1334.649994 | 1.007638  | <a href="#">TSSISNPNKMKP</a>  |
| 7.9   | 1334.649979 | 1.007653  | <a href="#">EETOSIEKRC</a>    |
| 7.3   | 1335.655777 | 0.001855  | <a href="#">KSEPETEEFIK</a>   |
| 7.3   | 1335.663010 | -0.005378 | <a href="#">QLRSQTSSESLTS</a> |

**Supplementary Fig. 1. Identification result of endogenous AtCAPE9 using Mascot MS/MS ion matching.**

The delta score (DS) for the endogenous AtCAPE9 was 19.7 (1<sup>st</sup> ranked matching score - 2<sup>nd</sup> ranked matching score, 33.4 - 13.7 = 19.7)

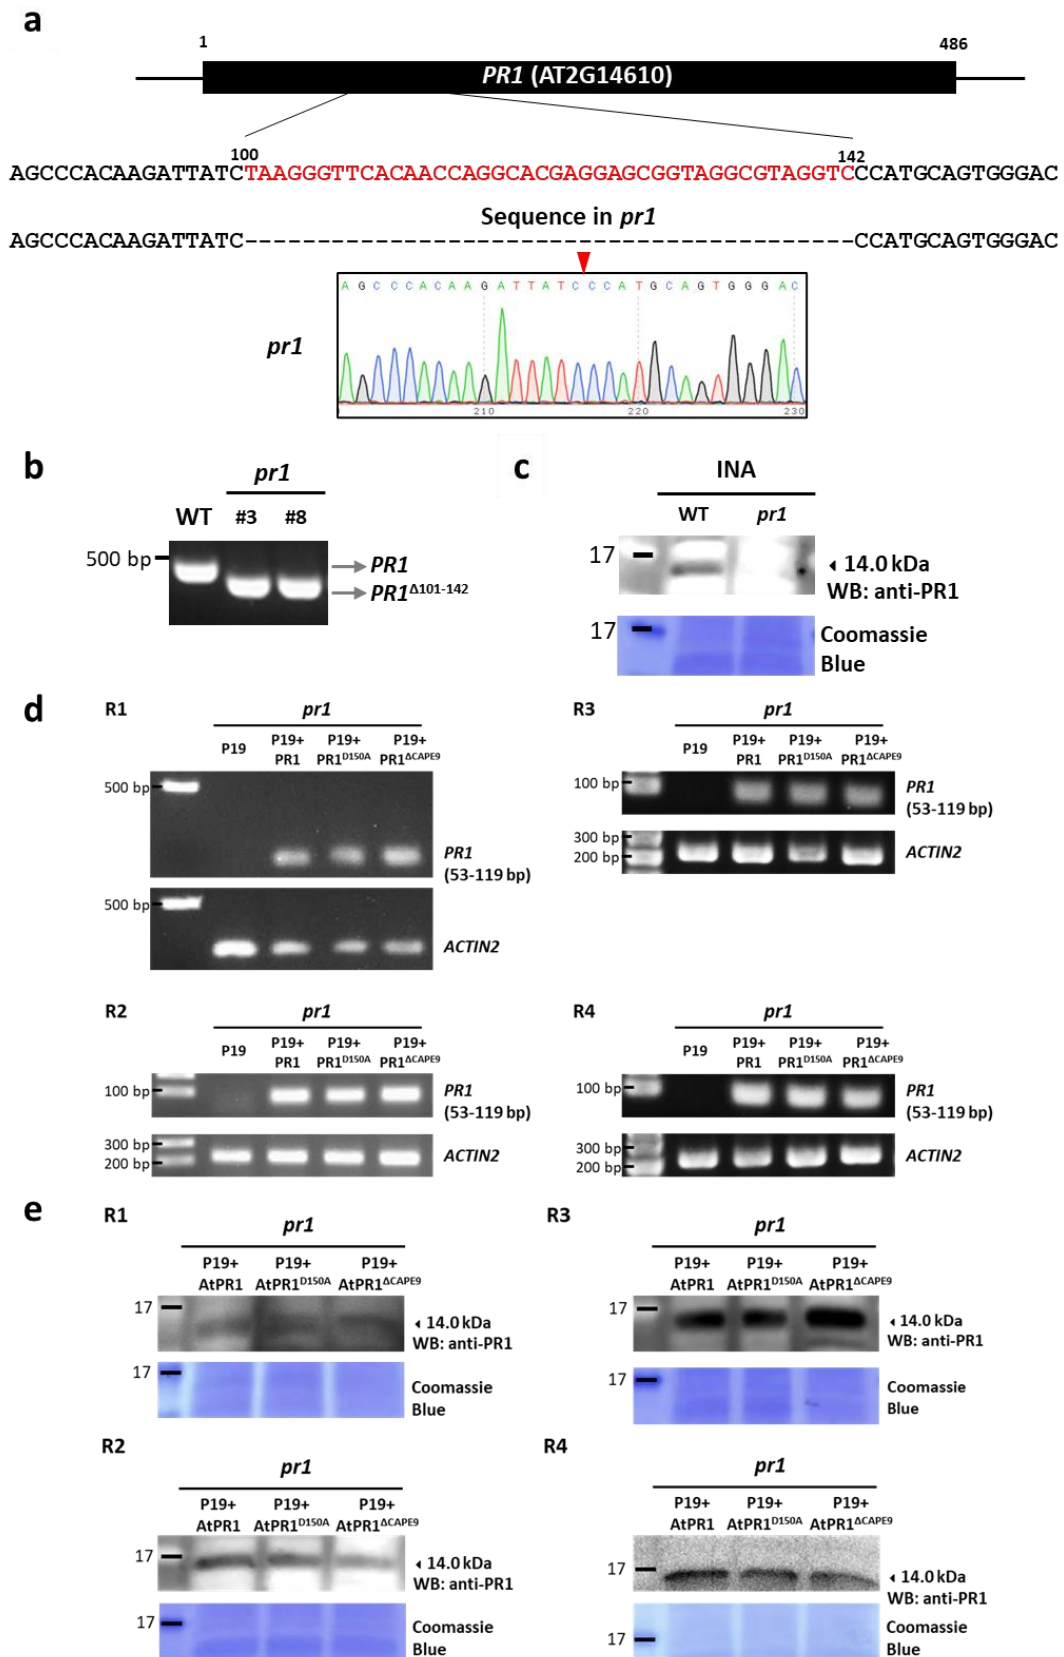

**Supplementary Fig. 2. Examination of *PR1* sequence and expression in *pr1* mutant with or without local transformation of native or mutated *PR1* by *Agrobacterium*.**

(a) Sequence of the truncated region (101-142 bp) of *PR1* (At2g14610) in the *pr1* *Arabidopsis* mutant

generated by CRISPR/Cas9. Experiments were repeated for three times with similar results. **(b)** Genotyping of *PR1* in WT and T2 lines (#3 and #8) of *pr1* mutant. **(c)** Immunoblot of PR1 in WT and *pr1* mutant using anti-PR1. The plants were treated by 60  $\mu$ M INA for 60 min. **(b, c)** Experiments were repeated for two times with similar results. **(d)** RT-PCR analysis of *PR1* using the primers targeting 53-119 bp of *PR1*. *ACTIN2* was used as internal control. **(e)** Immunoblot of PR1 in *pr1* infiltrated with *Agrobacterium* carrying *P19* plasmid together with *Agrobacterium* carrying native *PR1* (P19+PR1), alanine-substituted *PR1* (P19+PR1<sup>D150A</sup>), or CAPE9-truncated *PR1* (P19+PR1 <sup>$\Delta$ CAPE9</sup>) driven by 35S promotor. The sizes of native and mutated PR1 proteins were estimated to be 13~14 kDa, detected by western blotting with anti-PR1 antibody. Coomassie Blue staining shows total protein loaded. **(d, e)** Experiments were repeated for four times with similar results.

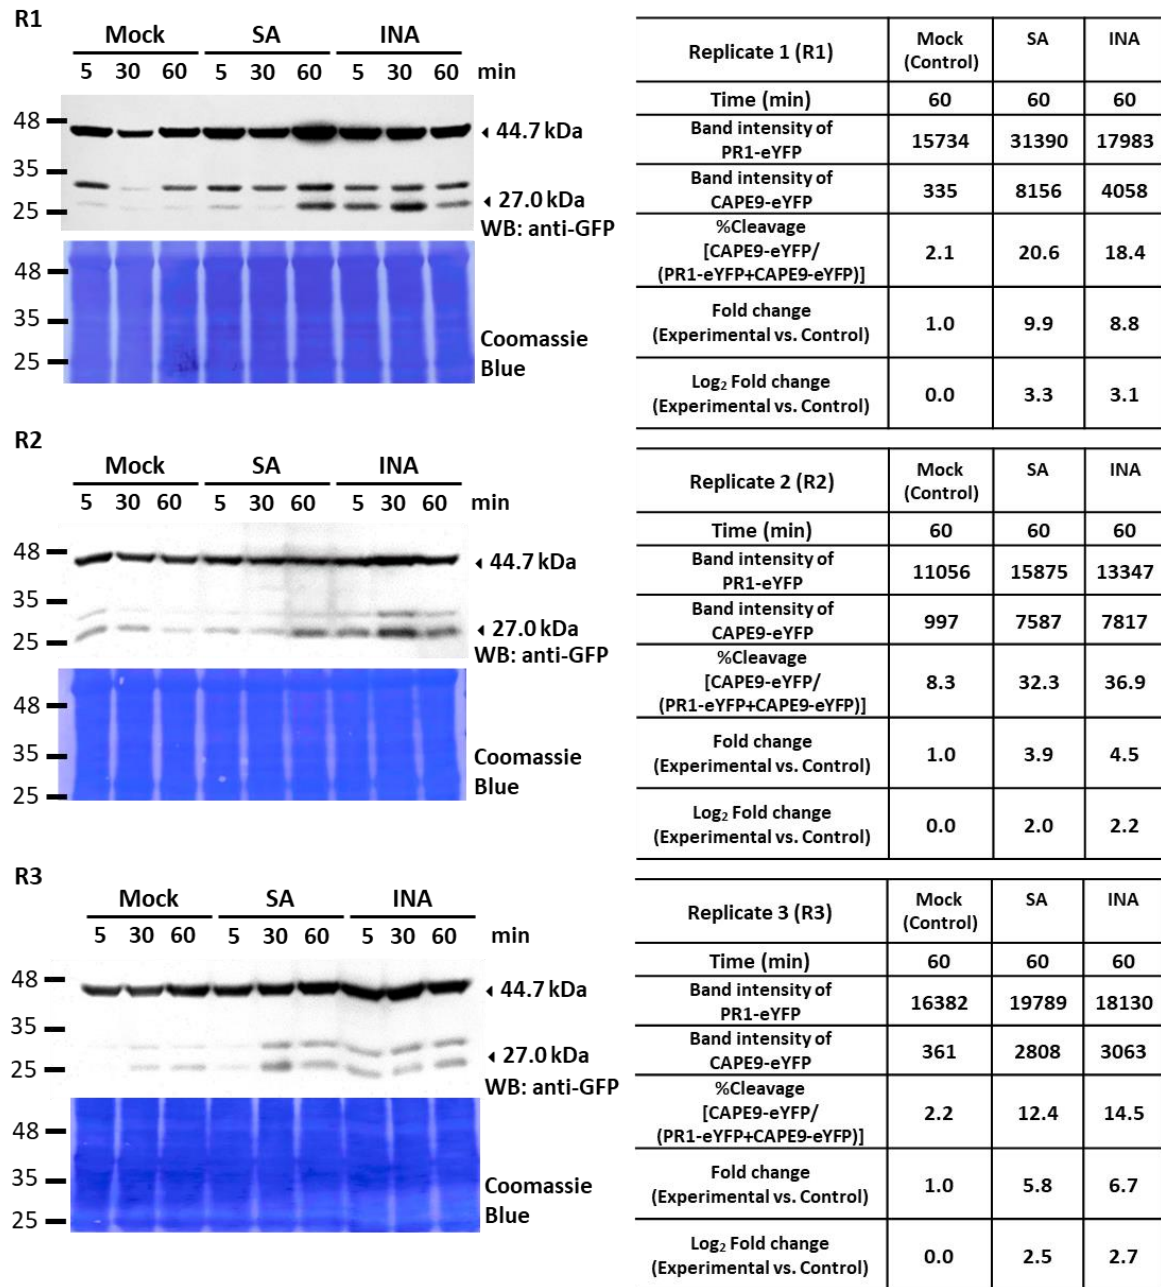

**Supplementary Fig. 3. Immunoblot of PR1-eYFP and AtCAPE9-eYFP fragment in transgenic *PR1-eYFP Arabidopsis* seedlings with Mock, SA or INA treatment.**

The seedlings were immersed in medium with 10 mM MgSO<sub>4</sub> (Mock), 60 μM INA in 10 mM MgSO<sub>4</sub> (INA), or 60 μM SA in 10 mM MgSO<sub>4</sub> (SA) for 5, 30 and 60 min. The sizes of the intact/uncleaved PR1-eYFP and the putative AtCAPE9-eYFP fragment were estimated to be ~44.7 and ~27.0 kDa, respectively. The percentage of the PR1-eYFP cleavage to produce AtCAPE9-eYFP fragment (noted as %Cleavage) was calculated by the band intensity of AtCAPE9-eYFP divided by the sum of the PR1-eYFP and AtCAPE9-eYFP band intensities [(AtCAPE9-eYFP)/(PR1-eYFP +AtCAPE9-eYFP)], detected by immunoblot using anti-GFP. Coomassie Blue staining shows total protein loaded. The band intensities in immunoblots were measured by ImageJ.

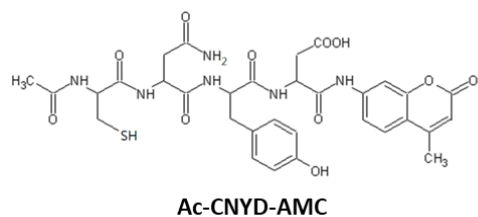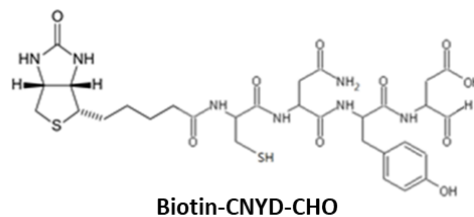

**Supplementary Fig. 4. Design of fluorogenic protease substrate and affinity aldehyde inhibitor based on the CNYD domain.**

Structure of fluorogenic protease substrate and affinity aldehyde inhibitor, shown as Ac-CNYD-AMC and biotin-CNYD-CHO, respectively.



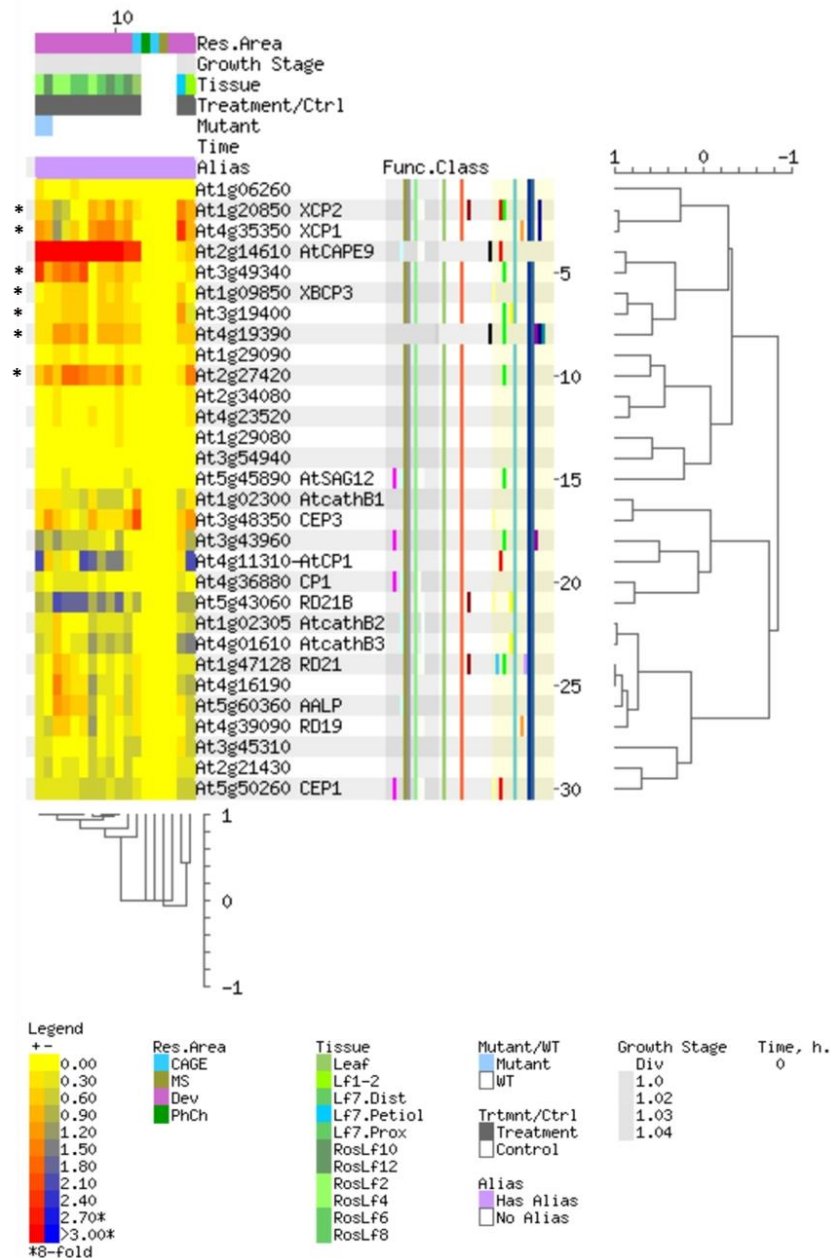

**Supplementary Fig. 5. Relative expression of papain-like cysteine proteases and PR1 (AtCAPE9) at different leaf developmental stages.**

The color scale indicates the log<sub>2</sub> of gene expression level above or below the median. Yellow shows the median value. Red indicates the gene is strongly expressed relative to the median expression levels, while dark blue indicates those poorly expressed. The expression pattern of *PR1* (labeled AtCAPE9/At2g14610) was hierarchically clustered with PLCP expression at all leaf stages to uncover potential correlations and, in turn, ESCAPE candidates (labeled with an asterisk). Data obtained from NASCArrays and the AtGenExpress Consortium (At3g48340 is not available) and analyzed by the Expression browser (*Plant J.* 2012, Vol. 43, pp. 153–163).

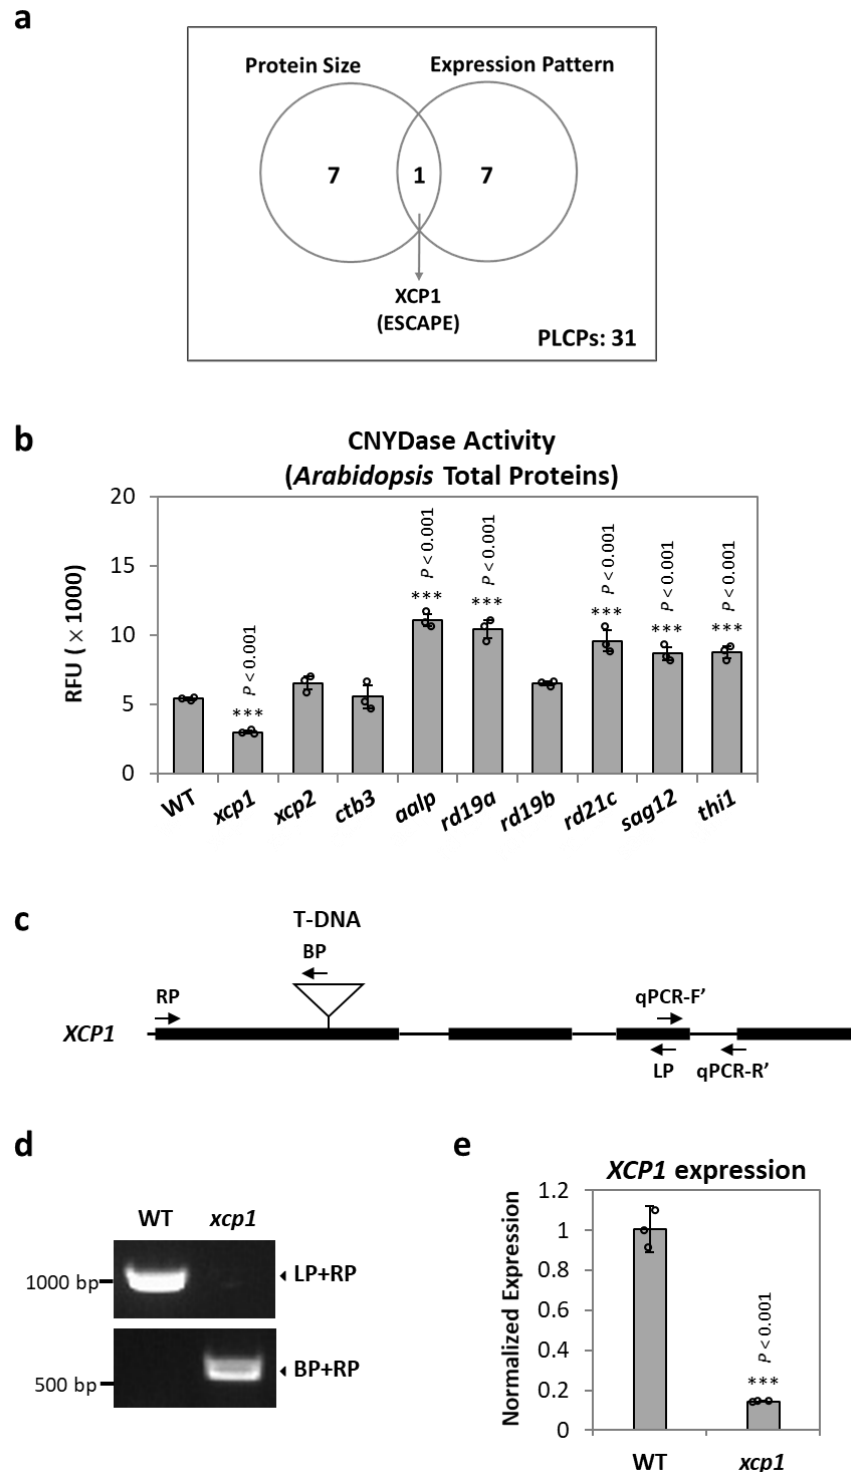

**Supplementary Fig. 6. Selection of ESCAPE from PLCPs and validation for the selected ESCAPE mutant.**

(a) Venn diagram of the ESCAPE candidates within the group of PLCPs, selected by their protein sizes (Supplementary Table 1) and expression patterns (Supplementary Fig. 5). (b) CNYDase activity of the selected papain-like cysteine protease mutants of *Arabidopsis*. The proteolytic activity assay was performed by incubating 50  $\mu$ g protein extracted from three seedlings with 25  $\mu$ M Ac-CNYD-AMC substrate. RFU of the cleaved fluorophore was measured after 5 h incubation with the substrate. Values are means  $\pm$  SD of three biological replicates. Each replicate was obtained from three seedlings. *P*

values were calculated by one-tailed unpaired *t*-test (\*\*,  $P < 0.01$ ). The stock number of these T-DNA insertion mutants were listed in Supplementary Table 2. (c) A scheme exhibited for T-DNA insertion site of *XCPI* gene in the T-DNA insertion *Arabidopsis* mutant (*xcp1*; SALK\_084789) and the primers designed for genotyping and quantifying the gene expression of *XCPI* in *xcp1* mutant. (d) The *xcp1* T-DNA insertion mutant was confirmed by genotyping. (e) The expression level of the *XCPI* gene in WT and *xcp1* determined by RT-qPCR. The expression of *ACTIN2* was used to normalize *XCPI* gene expression. Values are means  $\pm$  SD of three biological replicates. *P* values were calculated by one-tailed unpaired *t*-test (\*\*\*,  $P < 0.001$ ).

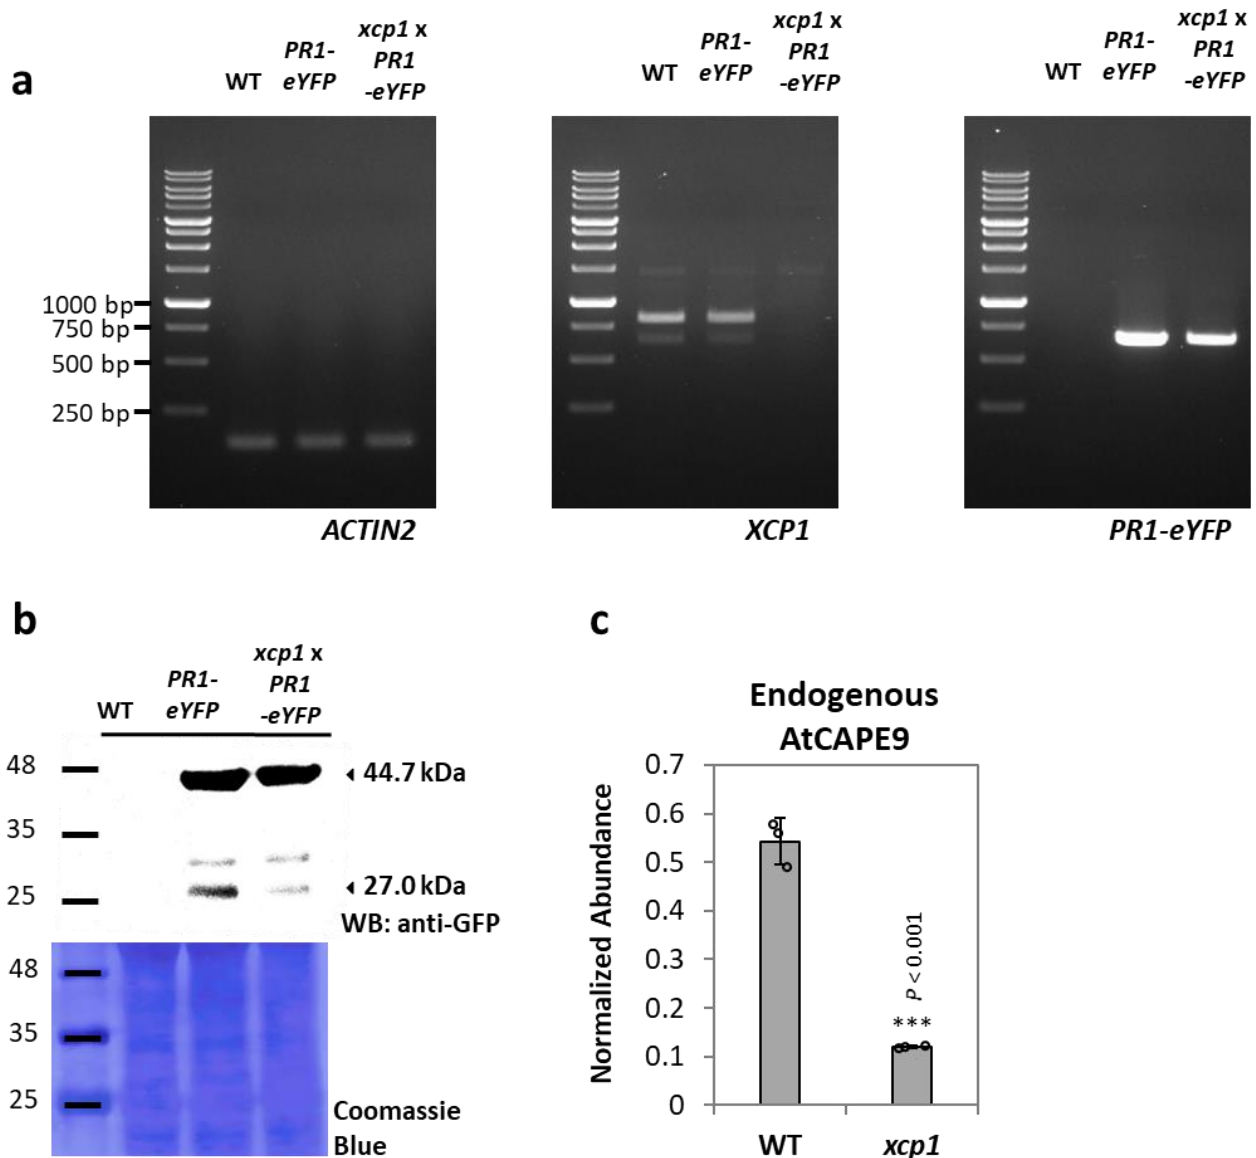

**Supplementary Fig. 7. Examination of the PR1 cleavage in *xcp1* × *PR1-eYFP* line and the AtCAPE9 abundance in *xcp1* mutant.**

(a) RT-PCR analysis was performed for detection of *ACTIN2*, *XCP1* and *PR1-eYFP* gene expression between WT, *PR1-eYFP* and the crossed line of *xcp1* × *PR1-eYFP* plants. Experiments were repeated for two times with similar results. (b) Immunoblot of the protein extract from WT, *PR1-eYFP* and the crossed line of *xcp1* × *PR1-eYFP* plants. The sizes of the intact PR1-eYFP and the putative AtCAPE9 fragment were estimated to be ~44.7 and ~27.0 kDa, respectively, detected by the anti-GFP. Coomassie Blue staining shows total protein loaded. Experiments were repeated for three times with similar results. (c) The abundance of endogenous AtCAPE9 in the *Arabidopsis* leaves with SA treatment between WT or *xcp1* plants. The abundance of AtCAPE9 was quantified and normalized by the abundance of a spiked internal control angiotensin I using LC-MS/MS analysis. Values are means ± SD of three technical replicates obtained from the analysis of a peptide mixture extracted from 5 g leaf tissues derived from a pool of five plants. *P* values were calculated by one-tailed unpaired *t*-test (\*\*\*, *P* < 0.001).

**a**

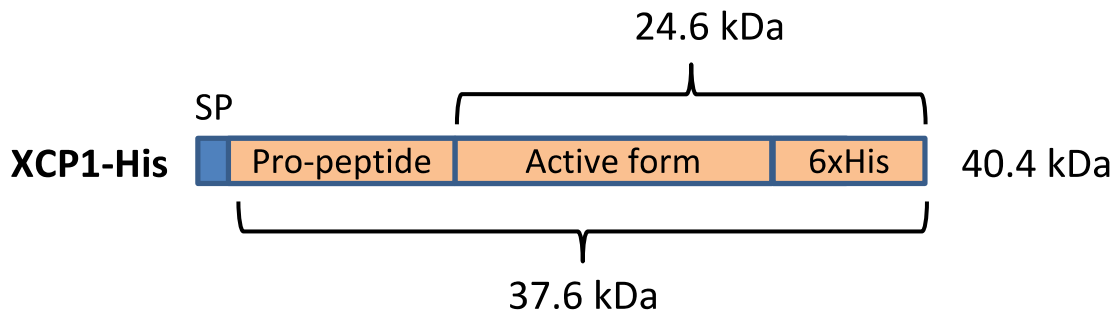

**b**

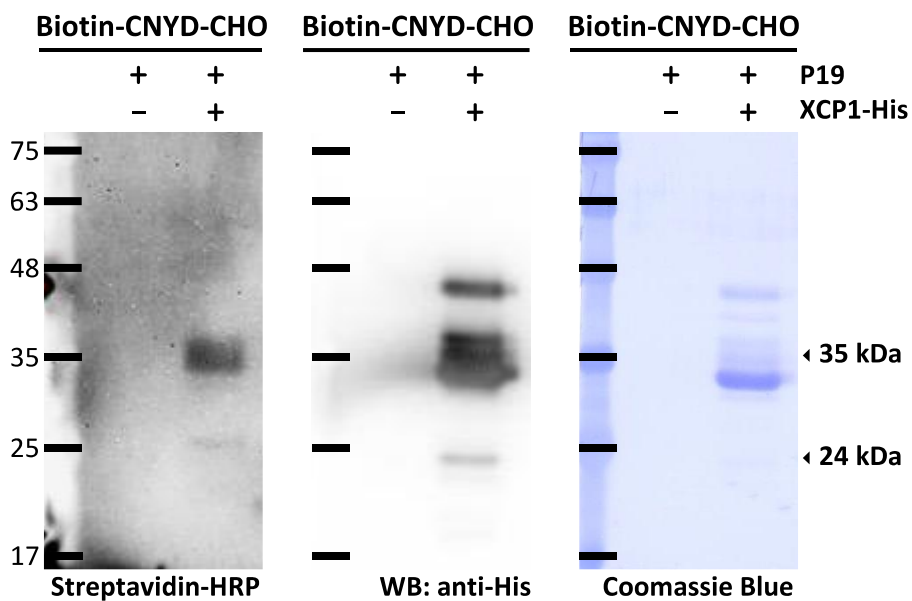

**Supplementary Fig. 8. Characterization of *Arabidopsis* XCP1-His purified from the *XCP1-His*-overexpressed *Nicotiana benthamiana*.**

(a) A scheme of *Arabidopsis* XCP1-His protein showing the molecular weight of the untruncated and truncated form. (b) Analysis of Ni-NTA purified proteins from the *Nicotiana benthamiana* leaves overexpressing *P19* or *P19* with *XCP1-His* genes. Purified proteins were labeled with biotin-CNYD-CHO and analyzed by immunoblot using anti-His antibody or streptavidin-HRP. Coomassie Blue staining shows all purified protein loaded. Experiments were repeated for three times with similar results.

### Enzyme Kinetics of XCP1-His

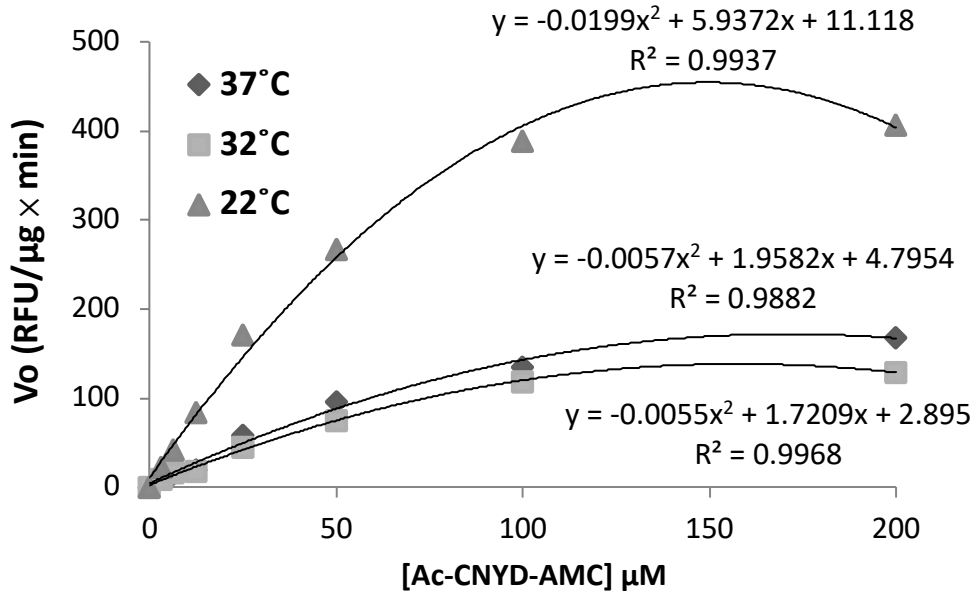

| Temp.                                      | 22°C   | 32°C   | 37°C   |
|--------------------------------------------|--------|--------|--------|
| <b>V<sub>max</sub></b><br>(RFU/(μg × min)) | 407.01 | 129.24 | 168.86 |
| <b>K<sub>m</sub> = [S]</b><br>(μM)         | 36.99  | 41.33  | 47.14  |

**Supplementary Fig. 9. Determination of the enzyme kinetics of *Arabidopsis* XCP1-His based on CNYDase activity under different temperatures.**

The  $V_{max}$  and  $K_m$  of proteolytic activity were determined by 2.5 h incubation of 1 μg purified XCP1-His with different concentrations of CNYD substrate at 22, 32 or 37°C.

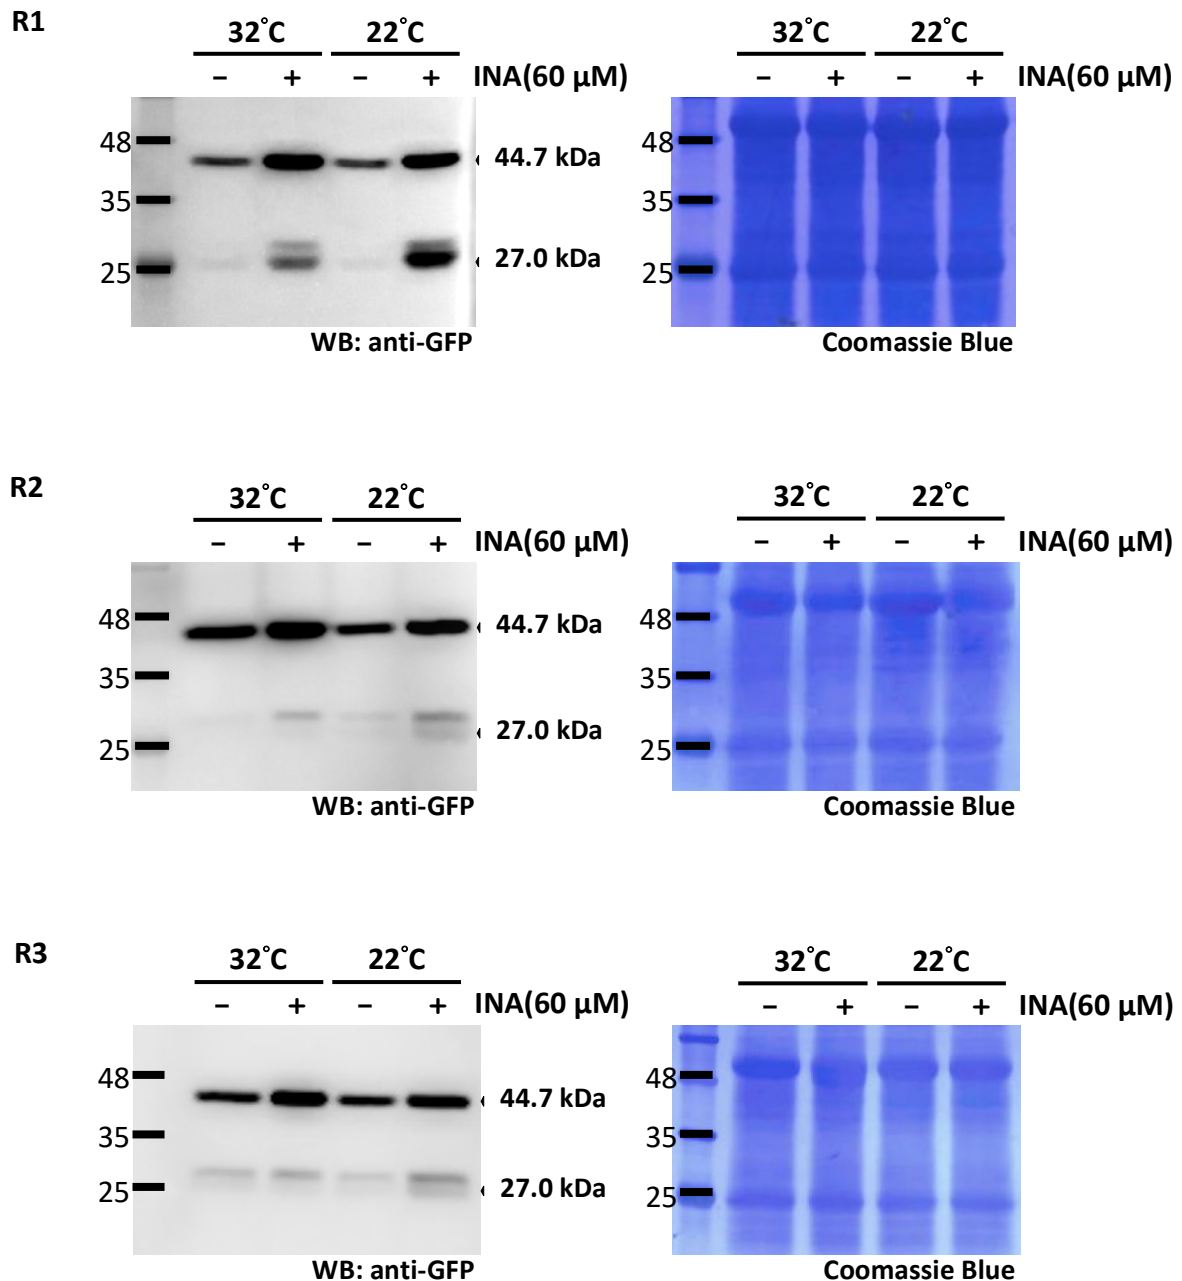

**Supplementary Fig. 10. Immunoblot of PR1-eYFP and AtCAPE9-eYFP fragment in transgenic *PR1-eYFP Arabidopsis* seedlings with Mock or INA treatment at 32 or 22°C.**

The seedlings were pre-incubated at 32 or 22°C before treatments for 30 min and then immersed in medium with 10 mM MgSO<sub>4</sub> (Mock) or 60 μM INA in 10 mM MgSO<sub>4</sub> (INA) for 60 min. The sizes of the intact/uncleaved PR1-eYFP and the putative AtCAPE9-eYFP fragment were estimated to be ~44.7 and ~27.0 kDa, respectively, detected by immunoblot using anti-GFP. Coomassie Blue staining shows total protein loaded.

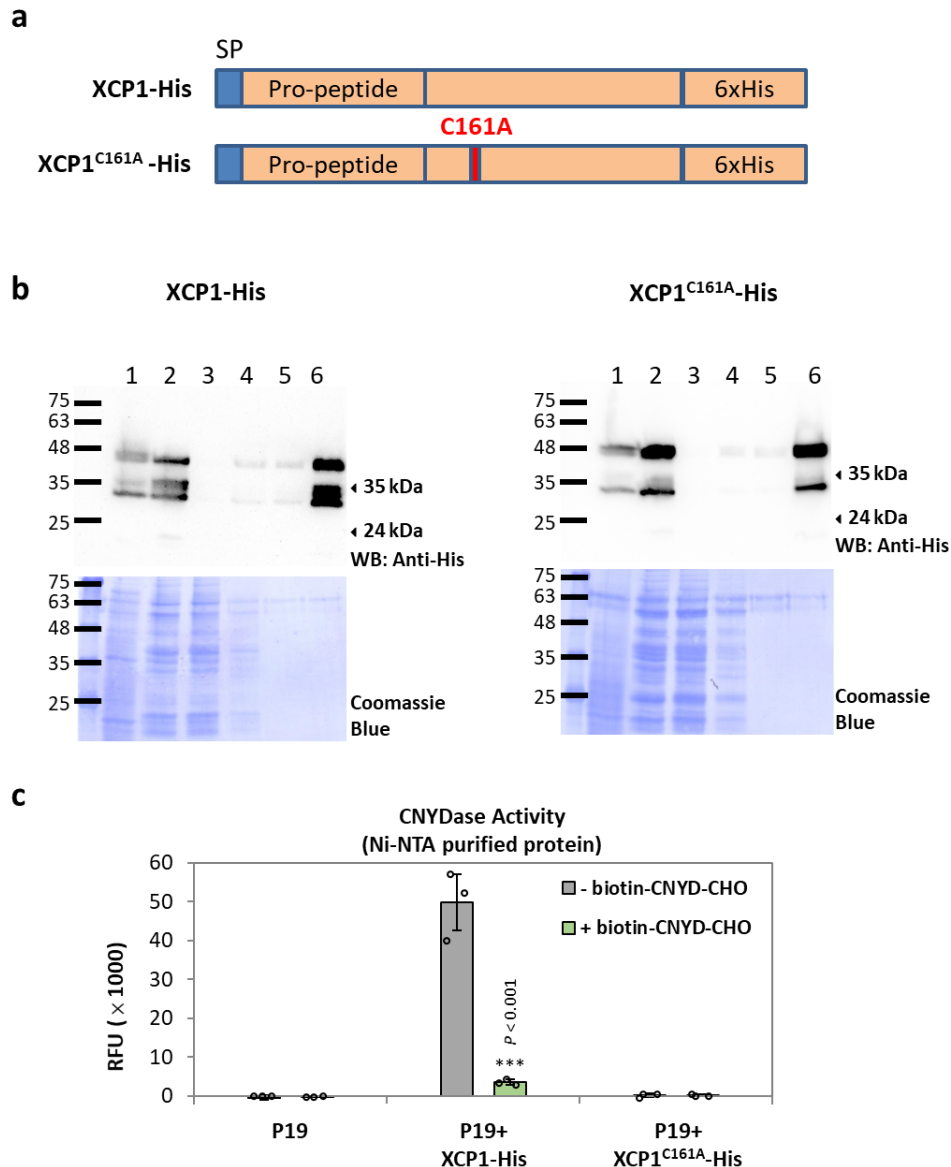

**Supplementary Fig. 11. Examination of the alanine-substituted mutation on the putative active site of *Arabidopsis* XCP1-His for CNYDase activity.**

(a) The schemes represent the original and alanine-substituted (C161A) XCP1-His protein sequences. (b) Analysis of Ni-NTA purified proteins extracted from the *Nicotiana benthamiana* overexpressing *P19* with *XCP1-His* or *P19* with *XCP1<sup>C161A</sup>-His* genes. Each step during purification was analyzed by immunoblot with anti-His antibody. Coomassie Blue staining shows all purified protein loaded. Lane 1, total protein extracts from *Nicotiana benthamiana* leaves; Lane 2, resuspended protein pellets after acetone precipitation; Lane 3, flow through (FT) after protein loading onto the Ni-NTA column; Lane 4 or 5: fraction washed by wash buffer; Lane 6, eluted proteins. Experiments were repeated for three times with similar results. (c) The CNYDase activity with or without adding 400  $\mu$ M biotin-CNYD-CHO to the Ni-NTA purified proteins from the *Nicotiana benthamiana* overexpressing *P19*, *P19* with *XCP1-His* and *P19* with *XCP1<sup>C161A</sup>-His* gene. The proteolytic activity assay was performed by incubating 0.5  $\mu$ g purified protein with 25  $\mu$ M Ac-CNYD-AMC substrate. RFU of the cleaved fluorophore was measured after 5 h incubation with the substrate. Values are means  $\pm$  SD of three independent experiments. Each experimental result was obtained by using five *Nicotiana benthamiana* plants overexpressing proteins transiently. *P* values were calculated by one-tailed unpaired *t*-test (\*\*\*, *P* < 0.001).



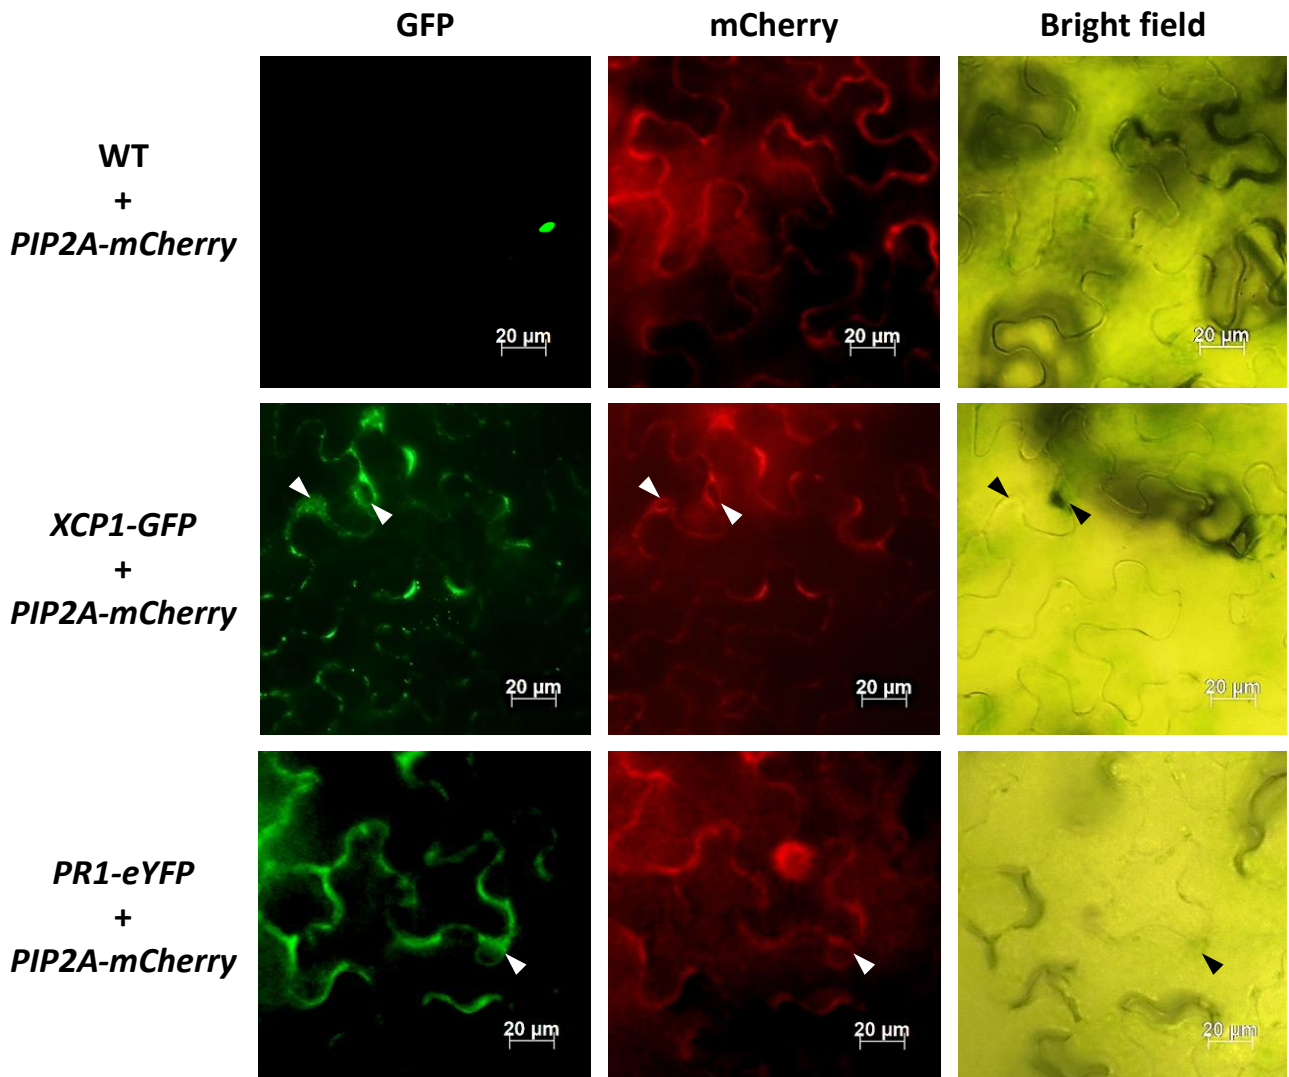

**Supplementary Fig. 12. Localization of XCP1-GFP and PR1-eYFP proteins in *Nicotiana benthamiana* leaves subjected to plasmolysis.**

The subcellular localization of XCP1 and PR1 were examined by transforming the *2x35S::XCP1-GFP* or *35S::PR1-eYFP* along with *35S::PIP2A-mCherry* in *Nicotiana benthamiana* leaves using *Agrobacterium* infiltration. After 1 M mannitol treatment, the location of overexpressed proteins under plasmolysis in *Nicotiana benthamiana* leaves were detected by fluorescence microscopy. PIP2A-mCherry was used to mark plasma membrane. The arrows indicate the apoplastic regions. Bar = 20  $\mu$ m. Experiments were repeated for three times with similar results.

**a**

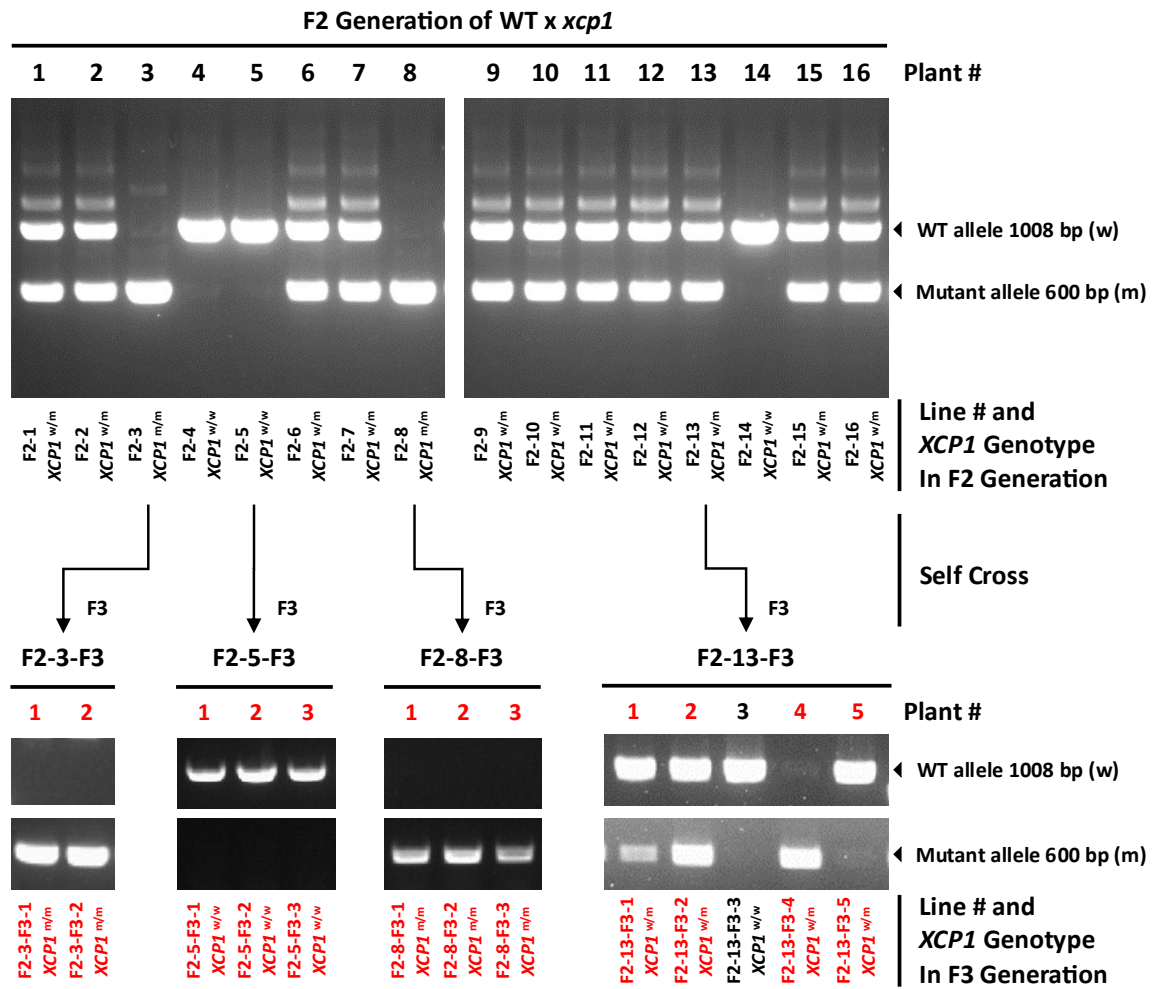

**b**

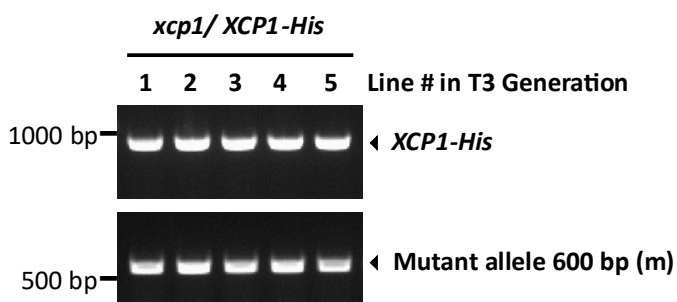

**c**

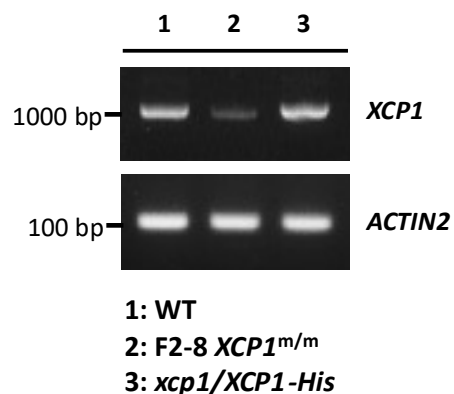

**Supplementary Fig. 13. Genotyping and gene expression of the *XCP1* in the crossed or mutated plant lines.**

(a) Genotyping for the *XCP1* zygosity in F2 and F3 generation of wild-type (WT) and *xcp1* crossed *Arabidopsis* plant (WT × *xcp1*) lines. Size marked for (w) wild-type *XCP1* and (m) mutated *XCP1* allele was 1008 bp (full length of *XCP1*) and 600 bp (T-DNA inserted *XCP1*), respectively. F2 lines of F2-1, F2-2, F2-6, F2-7, F2-9, F2-10, F2-11, F2-12, F2-13, F2-15 and F2-16 were identified as

heterozygous mutated *XCPI* (*XCPI<sup>w/m</sup>*) line. F2-3 and F2-8 were identified as homozygous mutated *XCPI* (*XCPI<sup>m/m</sup>*) line. F2-4, F2-5 and F2-14 were identified as homozygous wild-type *XCPI* (*XCPI<sup>w/w</sup>*) line. F2-3, F2-5, F2-8 and F2-13 were selected to cultivate F3 lines of F2-3-F3, F2-5-F3, F2-8-F3 and F2-13-F3 and genotyped. The selected plant # in each F3 progeny were in red color. The used primers were listed in Supplementary Table 3. Experiment was performed one time. **(b)** Genotyping for the *XCPI* zygosity in T3 generation of *xcp1/XCPI-His*. Experiments were repeated for three times with similar results. **(c)** The expression of the *XCPI* in the wild-type (WT), *XCPI<sup>m/m</sup>* (F2-8) and *XCPI-His* complemented *xcp1 (xcp1/XCPI-His)* plants determined by RT-PCR (25 cycles). The expression of *ACTIN2* was used as loading control. Experiments were repeated for two times with similar results.

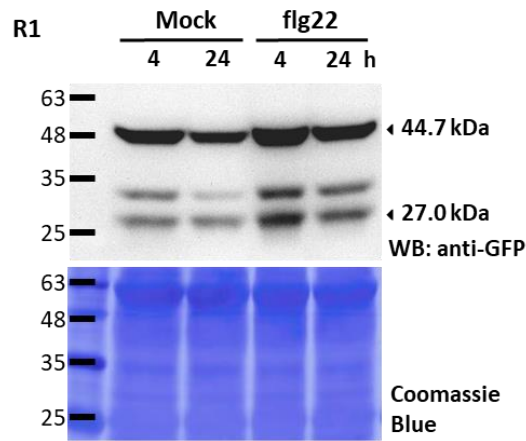

| Replicate 1 (R1)                                        | Mock (Control) |       | flg22 |       |
|---------------------------------------------------------|----------------|-------|-------|-------|
| Time (min)                                              | 4              | 24    | 4     | 24    |
| Band intensity of PR1-eYFP                              | 18200          | 16124 | 21155 | 16955 |
| Band intensity of CAPE9-eYFP                            | 6691           | 5818  | 10322 | 7865  |
| %Cleavage [CAPE9-eYFP/(PR1-eYFP+CAPE9-eYFP)]            | 26.9           | 26.5  | 32.8  | 31.7  |
| Fold change (Experimental vs. Control)                  | 1.0            | 1.0   | 1.2   | 1.2   |
| Log <sub>2</sub> Fold change (Experimental vs. Control) | 0.0            | 0.0   | 0.3   | 0.3   |

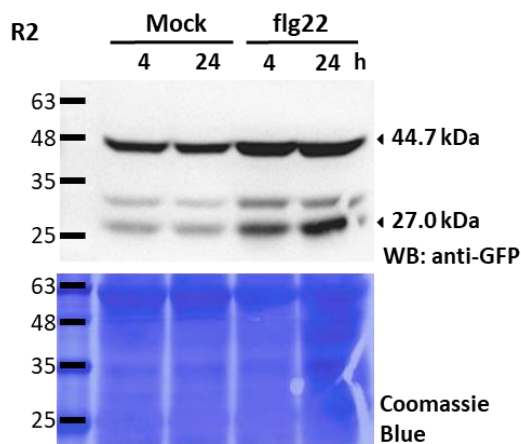

| Replicate 2 (R2)                                        | Mock (Control) |       | flg22 |       |
|---------------------------------------------------------|----------------|-------|-------|-------|
| Time (min)                                              | 4              | 24    | 4     | 24    |
| Band intensity of PR1-eYFP                              | 10872          | 10327 | 15376 | 15913 |
| Band intensity of CAPE9-eYFP                            | 3734           | 3622  | 8355  | 10381 |
| %Cleavage [CAPE9-eYFP/(PR1-eYFP+CAPE9-eYFP)]            | 25.6           | 26.0  | 35.2  | 39.5  |
| Fold change (Experimental vs. Control)                  | 1.0            | 1.0   | 1.4   | 1.5   |
| Log <sub>2</sub> Fold change (Experimental vs. Control) | 0.0            | 0.0   | 0.5   | 0.6   |

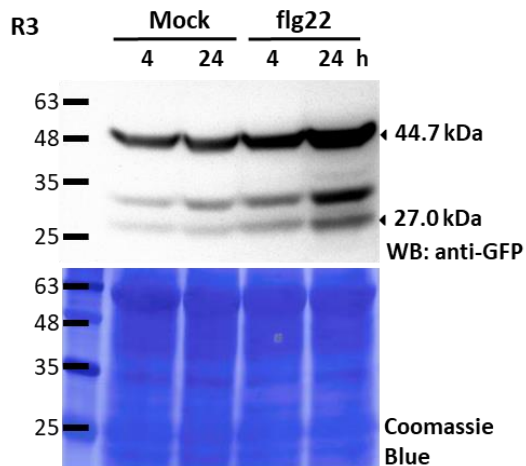

| Replicate 3 (R3)                                        | Mock (Control) |       | flg22 |       |
|---------------------------------------------------------|----------------|-------|-------|-------|
| Time (min)                                              | 4              | 24    | 4     | 24    |
| Band intensity of AtPR1-eYFP                            | 12423          | 17768 | 23136 | 26912 |
| Band intensity of AtCAPE9-eYFP                          | 1471           | 2472  | 4280  | 5751  |
| %Cleavage [AtCAPE9-eYFP/(AtPR1-eYFP+AtCAPE9-eYFP)]      | 10.6           | 12.2  | 15.6  | 17.6  |
| Fold change (Experimental vs. Control)                  | 1.0            | 1.0   | 1.5   | 1.4   |
| Log <sub>2</sub> Fold change (Experimental vs. Control) | 0.0            | 0.0   | 0.6   | 0.5   |

**Supplementary Fig. 14. Immunoblot of the protein extract from *PR1-eYFP* transgenic plant seedlings treated with flg22 using anti-GFP.**

The seedlings were immersed in medium with 10 mM MgSO<sub>4</sub> (Mock), 500 nM flg22 in 10 mM MgSO<sub>4</sub> for 4 and 24 h. The sizes of the intact PR1-eYFP and the putative AtCAPE9 fragment were estimated to be ~44.7 and ~27.0 kDa, respectively. The percentage of the PR1-eYFP cleavage (%Cleavage) was calculated by the band intensity of AtCAPE9-eYFP divided by the sum of the PR1-eYFP and AtCAPE9-eYFP band intensities [(AtCAPE9-eYFP)/(PR1-eYFP+AtCAPE9-eYFP)], detected by immunoblot using anti-GFP. Coomassie Blue staining shows total protein loaded. The band intensities in immunoblots were measured by ImageJ.

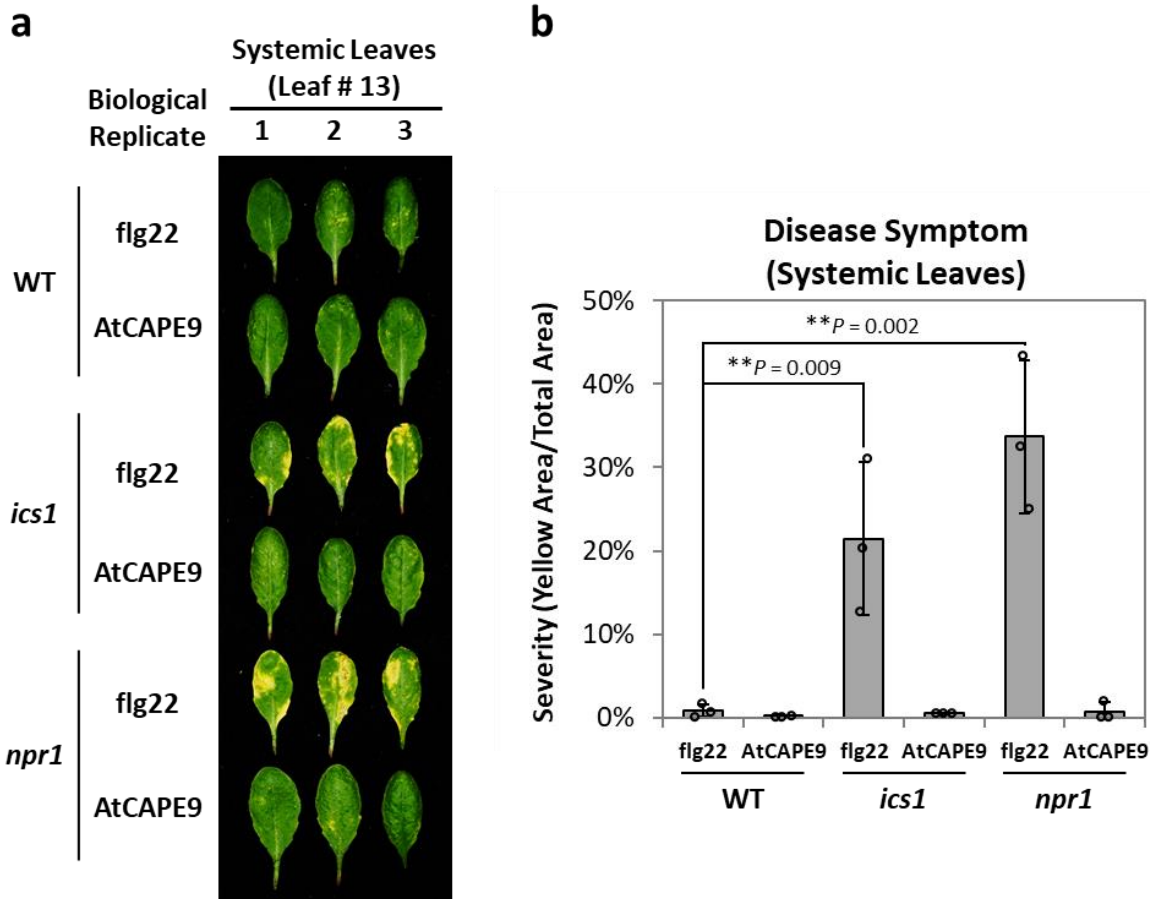

**Supplementary Fig. 15. Systemic immunity of wild-type, *ics1* and *npr1* elicited by local treatment of pathogen elicitor flg22 or phytochemical AtCAPE9.**

(a) The disease symptom of the *Pst* DC3000-infected systemic leaves of wild-type (WT), *ics1* and *npr1* mutant pre-infiltrated local leaves with flg22 or AtCAPE9. The local pre-infiltrations were performed on the leaf # 7-11 as defined in Fig. 2 and other leaves without infiltration were used as systemic leaves. After 2 days of local infiltration, both local and systemic leaves were inoculated with *Pst* DC3000 for 5 days and collected systemic leaves for disease symptom assessment. (b) Levels of disease severity of systemic leaves were measured by the percentage of yellow area in total area for the corresponding photographs using the PIDIQ software. Values are means  $\pm$  SD of three biological replicates. *P* values were calculated by one-tailed unpaired *t*-test (\*\*,  $P < 0.01$ ).
